# Supplementary material for: The genomic features of parasitism, Polyembryony and immune evasion in the endoparasitic wasp Macrocentrus cingulum
Source: PubMed Central journal article supplement (PMC5977540; doi:10.1186/s12864-018-4783-x), 2018-05-30
Supplement: 12864_2018_4783_MOESM1_ESM.pdf [file 12864_2018_4783_MOESM1_ESM.pdf]

## Supplementary Figures

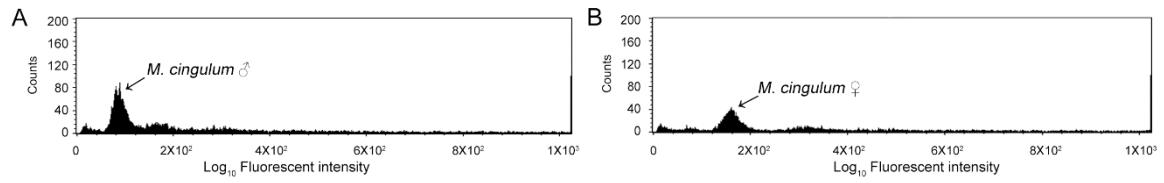

Figure S1. Flow cytometry estimation of the genome size for the *M. cingulum*.

A) The Flow cytometry estimation of the male. B) Flow cytometry estimation of the female.

*Macrocentrus cingulum* 17-mer depth distribution curve

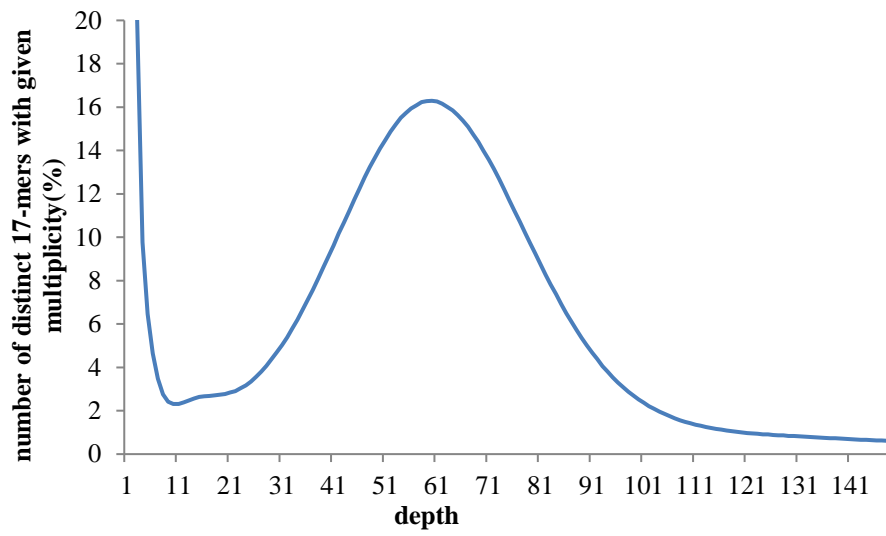

Figure S2. The distribution of 17-mer frequency in *M. cingulum* genome sequencing reads

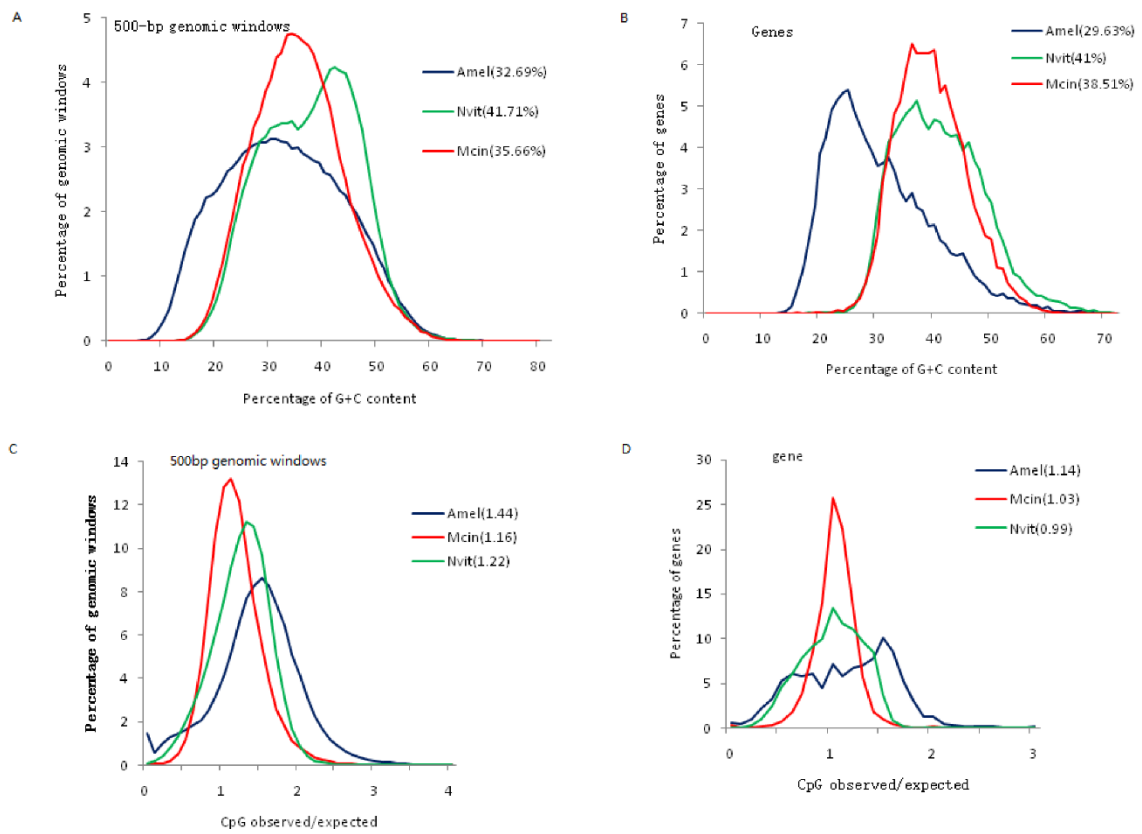

Figure S3. Distribution of GC content, CpG Obs/Exp Ratios of *M. cingulum*(Mcin), *N. vitripennis*(Nvit) and *A. mellifer*(Amel)

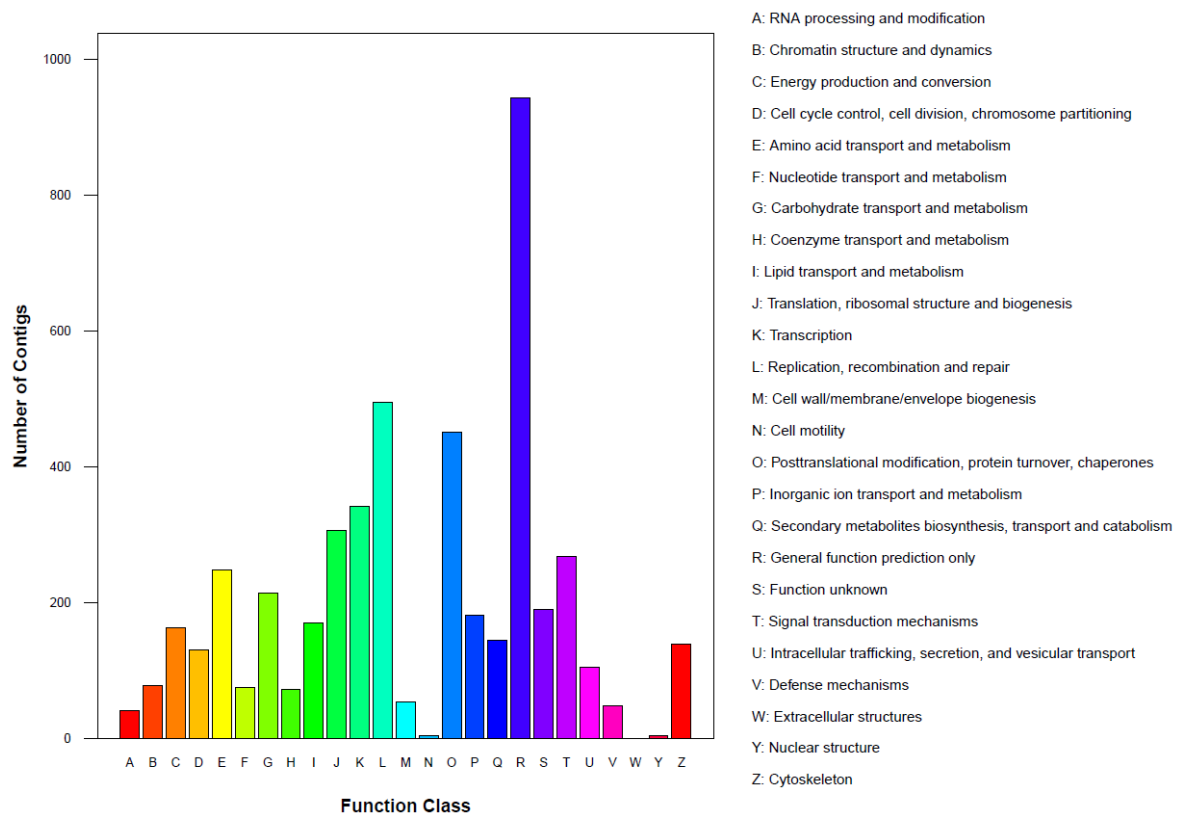

Figure S4. COG function classification of the OGS in *M. cingulum*

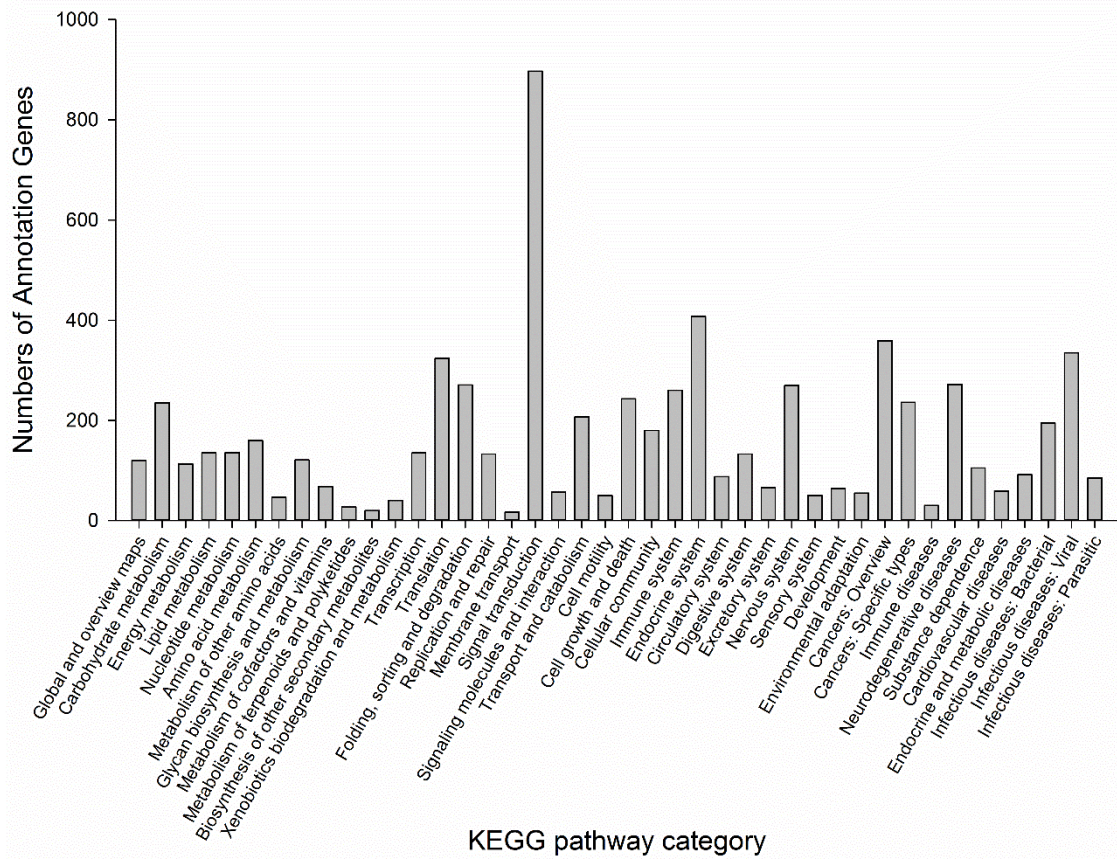

Figure S5. KEGG pathway analysis of the OGS in *M. cingulum*

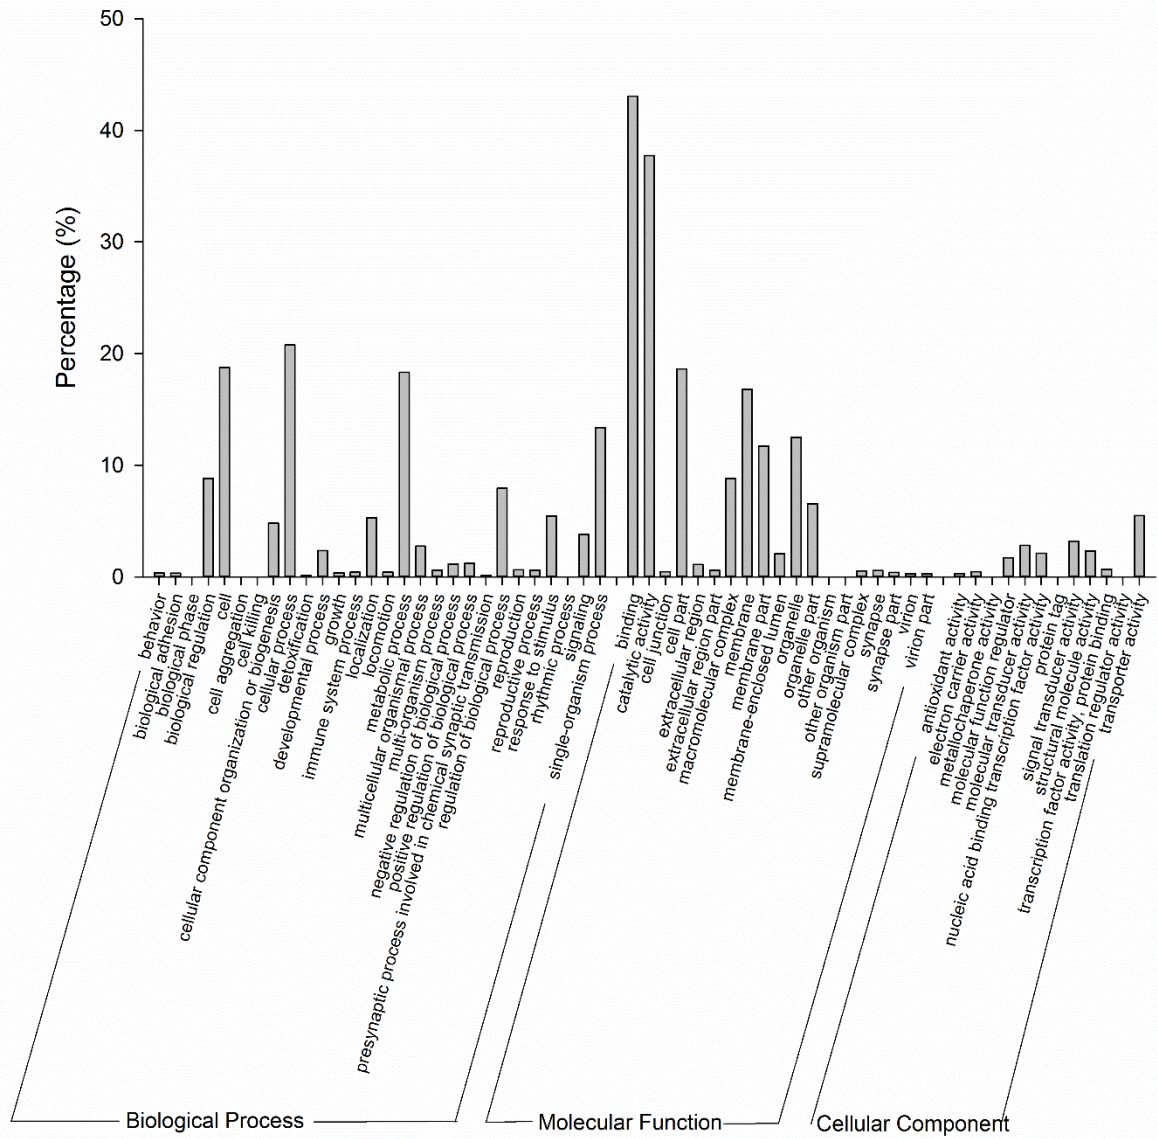

Figure S6. GO classification of the OGS in *M. cingulum*

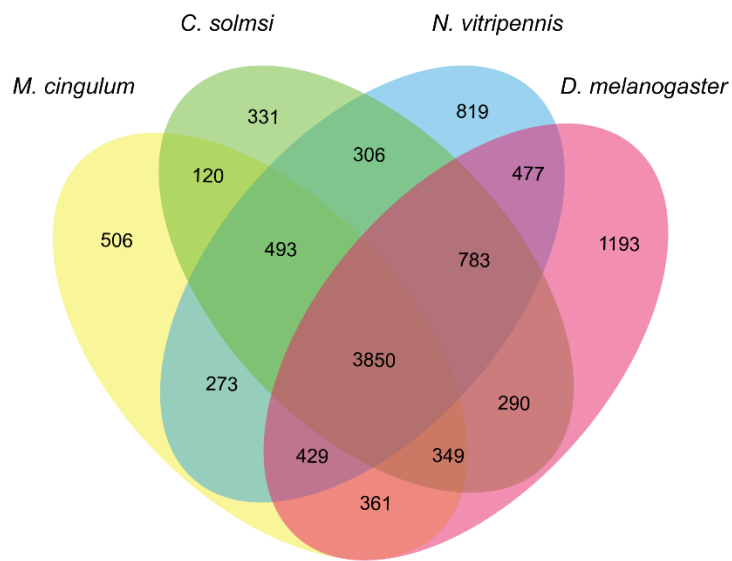

Figure S7. Venn diagram of the homologous protein-coding genes among three wasps (*M. cingulum*, *C. solmsi*, *N. vitripennis*) and fruit fly (*D. melanogaster*)

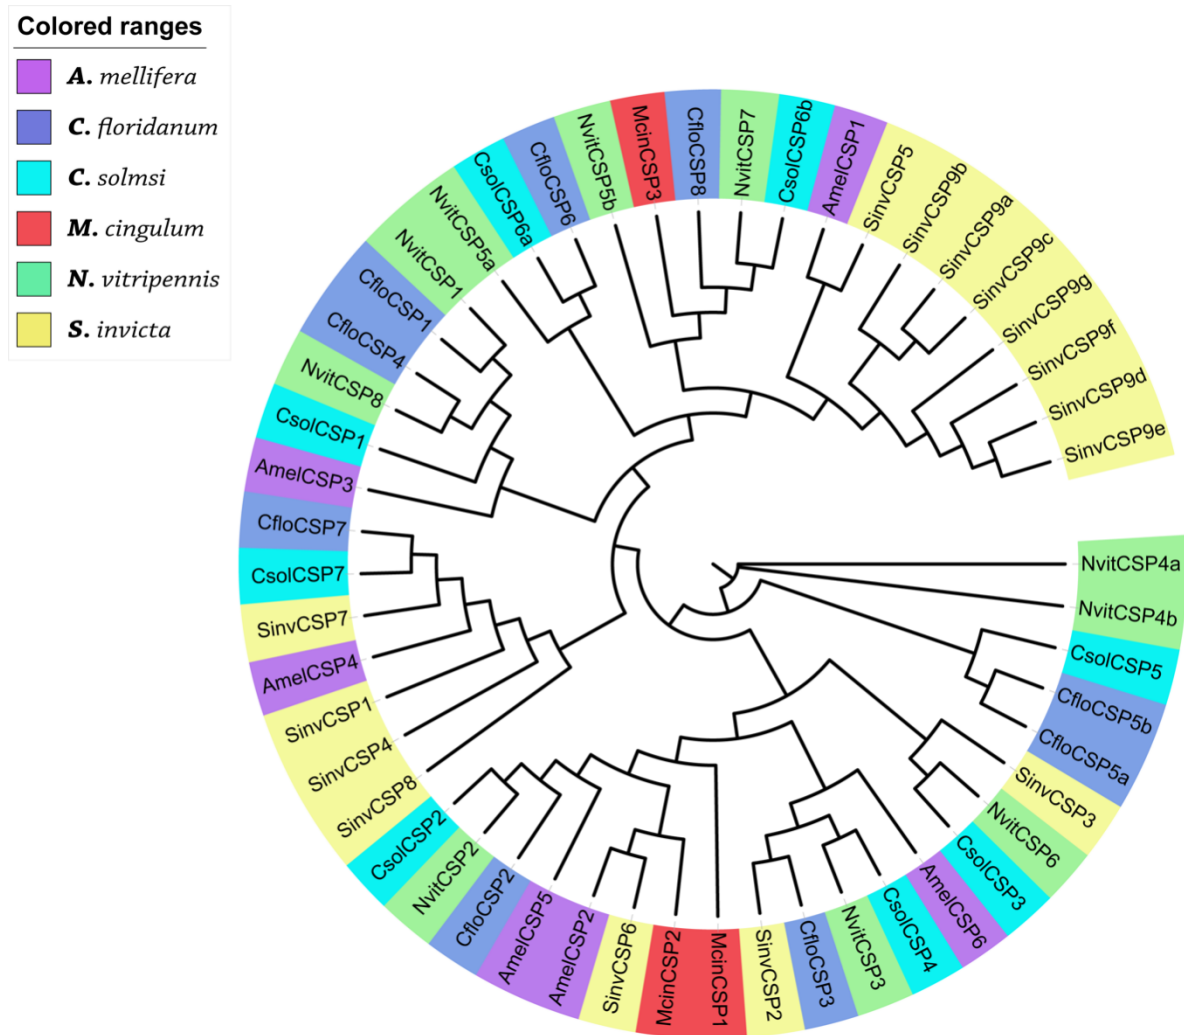

Figure S8. Phylogenetic relationship of CSP proteins from *A. mellifera*, *C. floridanum*, *C. solmsi*, *M. cingulum*, *N. vitripennis*, *S. invicta*





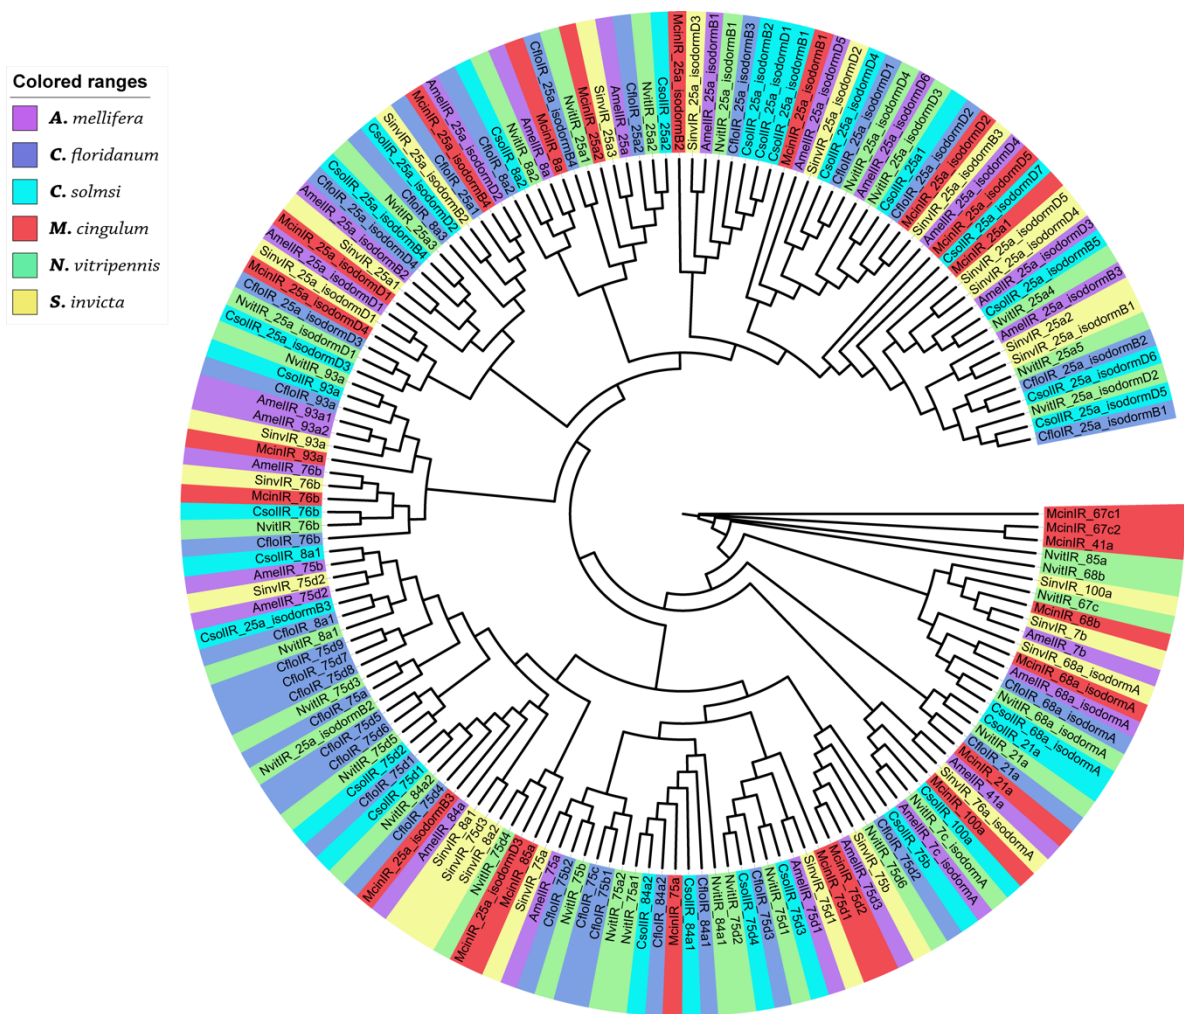

Figure S10. Phylogenetic relationship of IR proteins from *A. mellifera*, *C. floridanum*, *C. solmsi*, *M. cingulum*, *N. vitripennis*, *S. invicta*

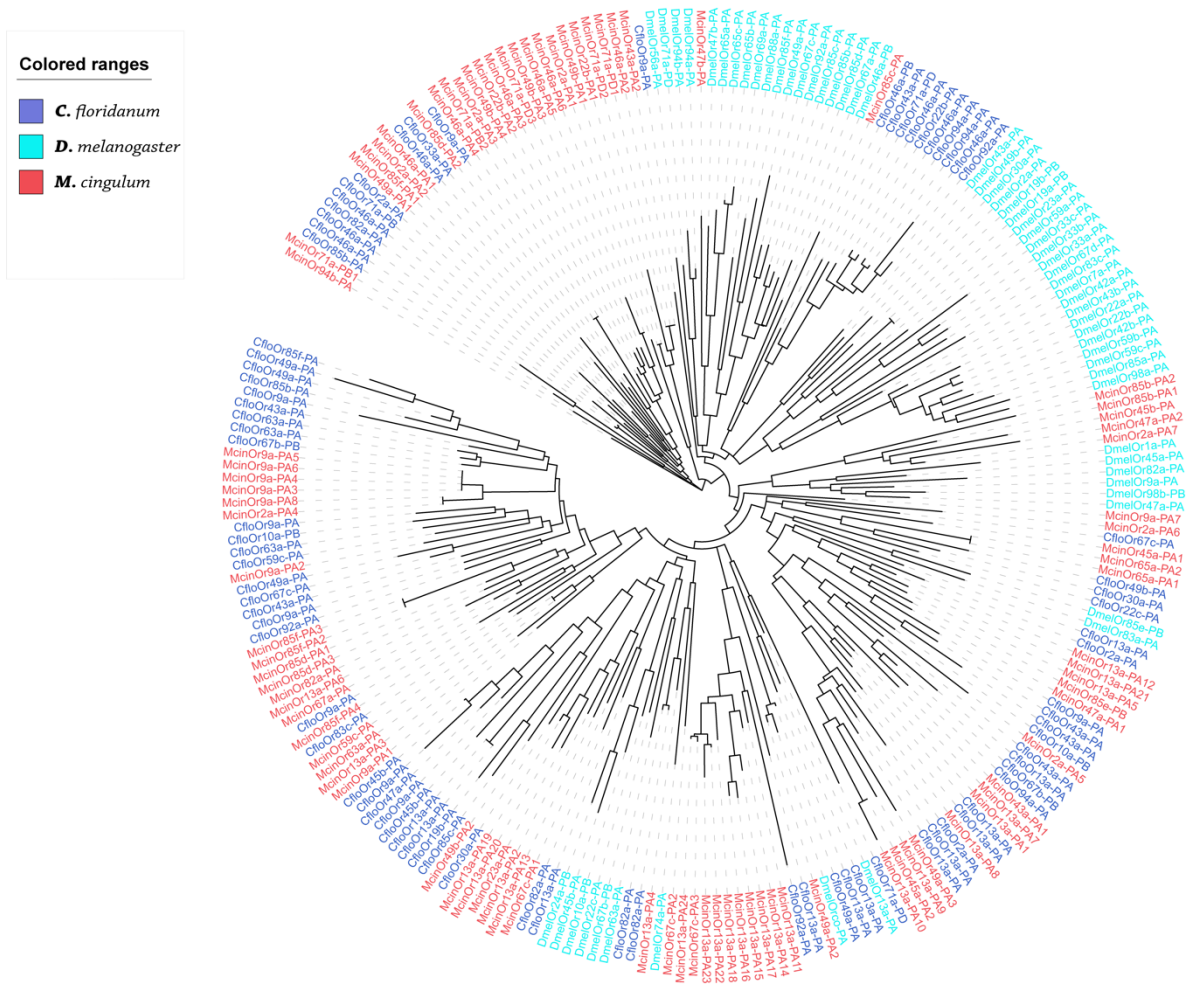

Figure S11. Phylogenetic relationship of OR proteins from *C. floridanum*, *D. melanogaster* and *M. cingulum*

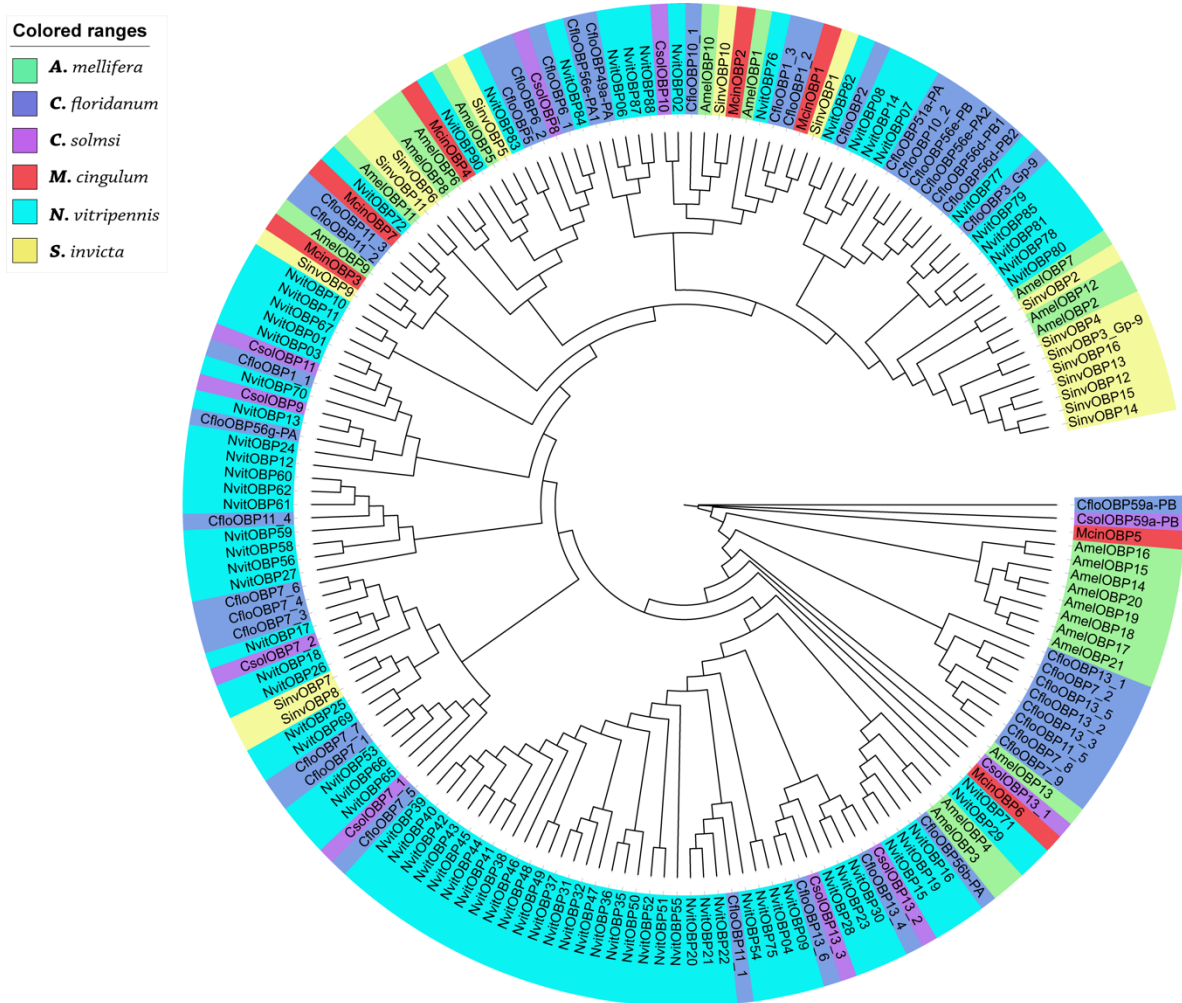

Figure S12. Phylogenetic relationship of OBP proteins from *A. mellifera*, *C. floridanum*, *C. solmsi*, *M. cingulum*, *N. vitripennis*, *S. invicta*

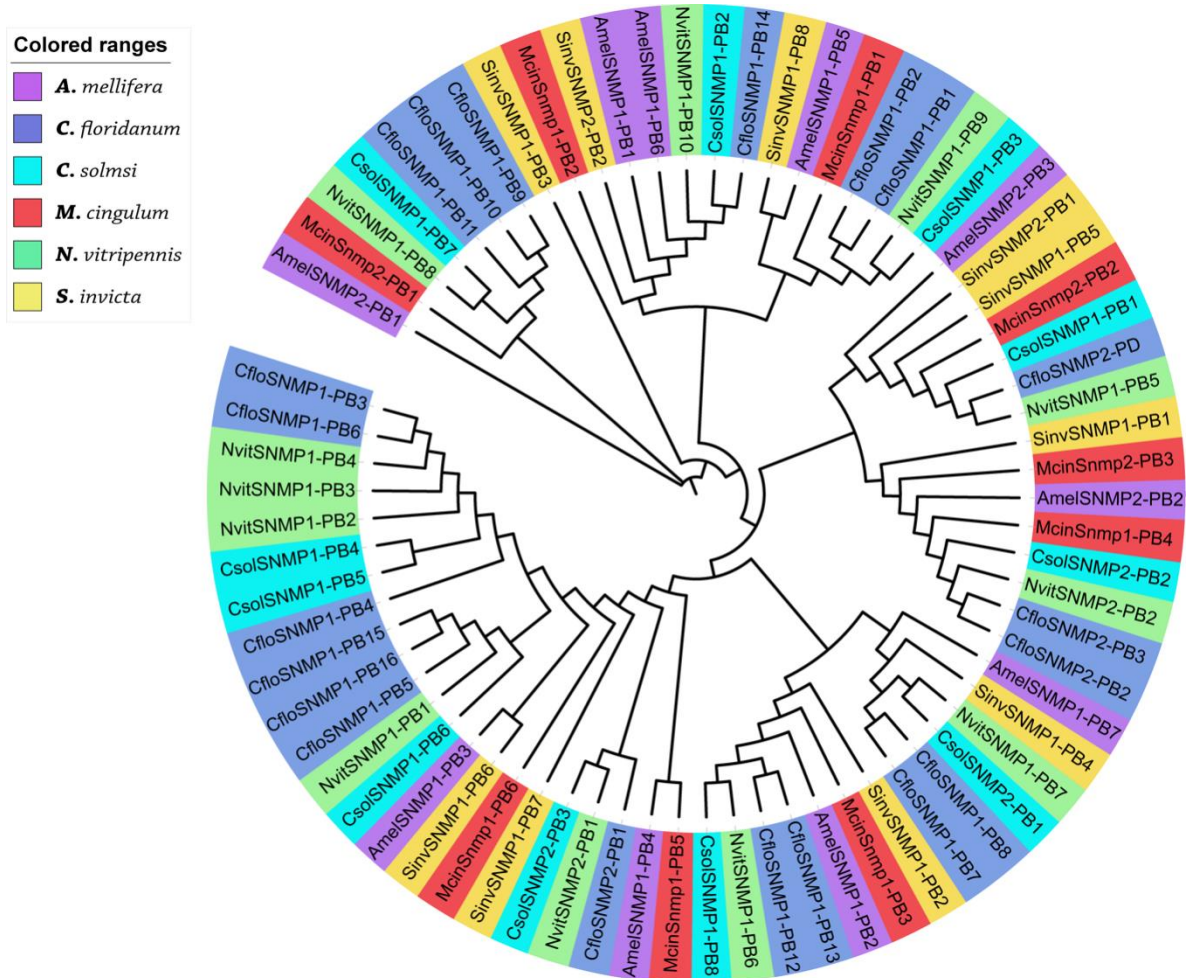

Figure S13. Phylogenetic relationship of SNMP proteins from *A. mellifera*, *C. floridanum*, *C. solmsi*, *M. cingulum*, *N. vitripennis*, *S. invicta*

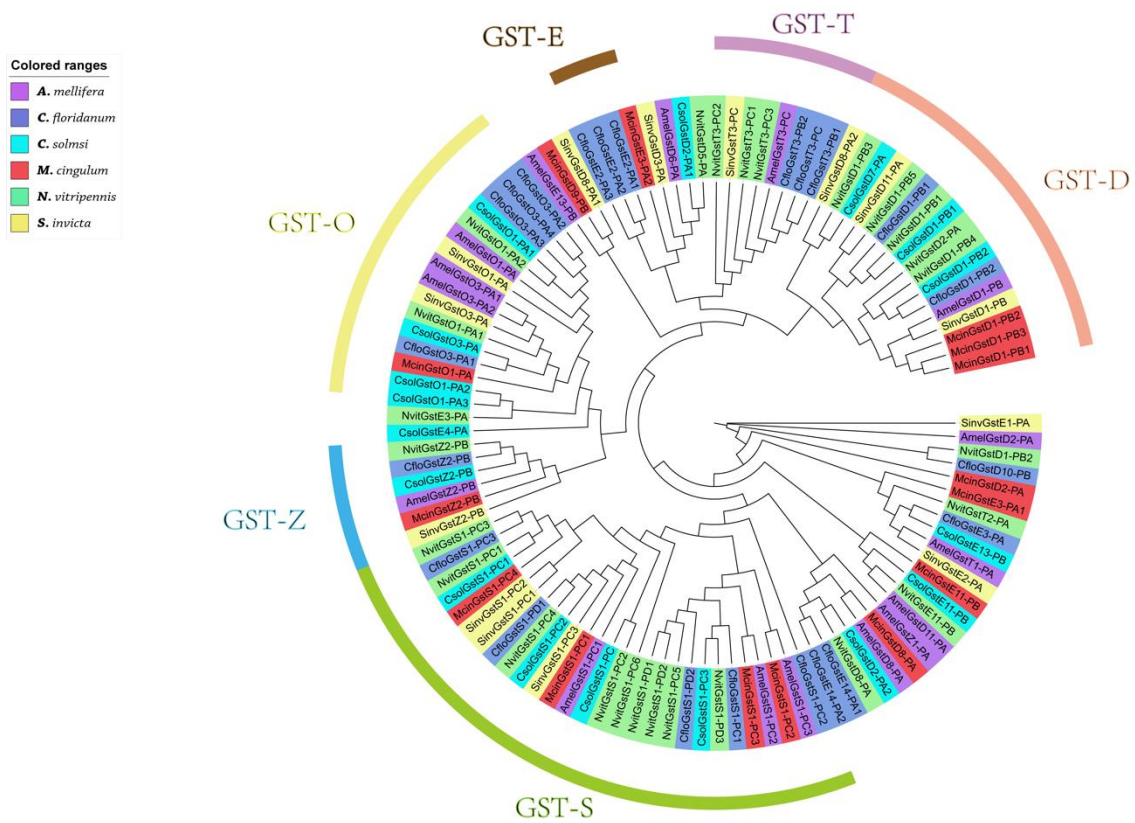

Figure S14. Phylogenetic relationship of GST proteins from *A. mellifera*, *C. floridanum*, *C. solmsi*, *M. cingulum*, *N. vitripennis*, *S. invicta*

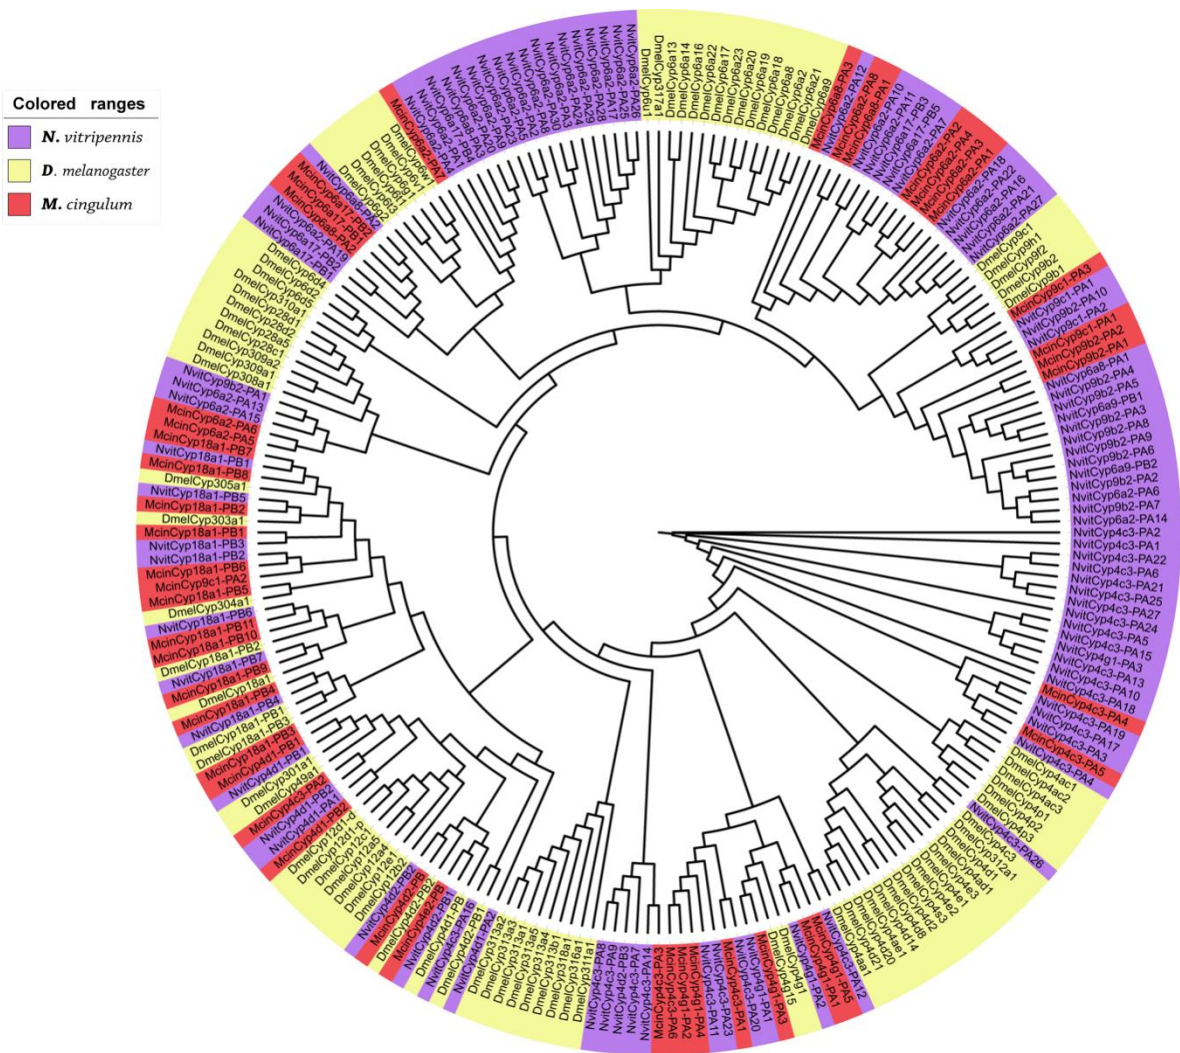

Figure S15. Phylogenetic relationship of P450 proteins from *N. vitripennis*, *D. melanogaster* and *M. cingulum*

**Colored ranges**

■ *M. cingulum*

■ *D. melanogaster*

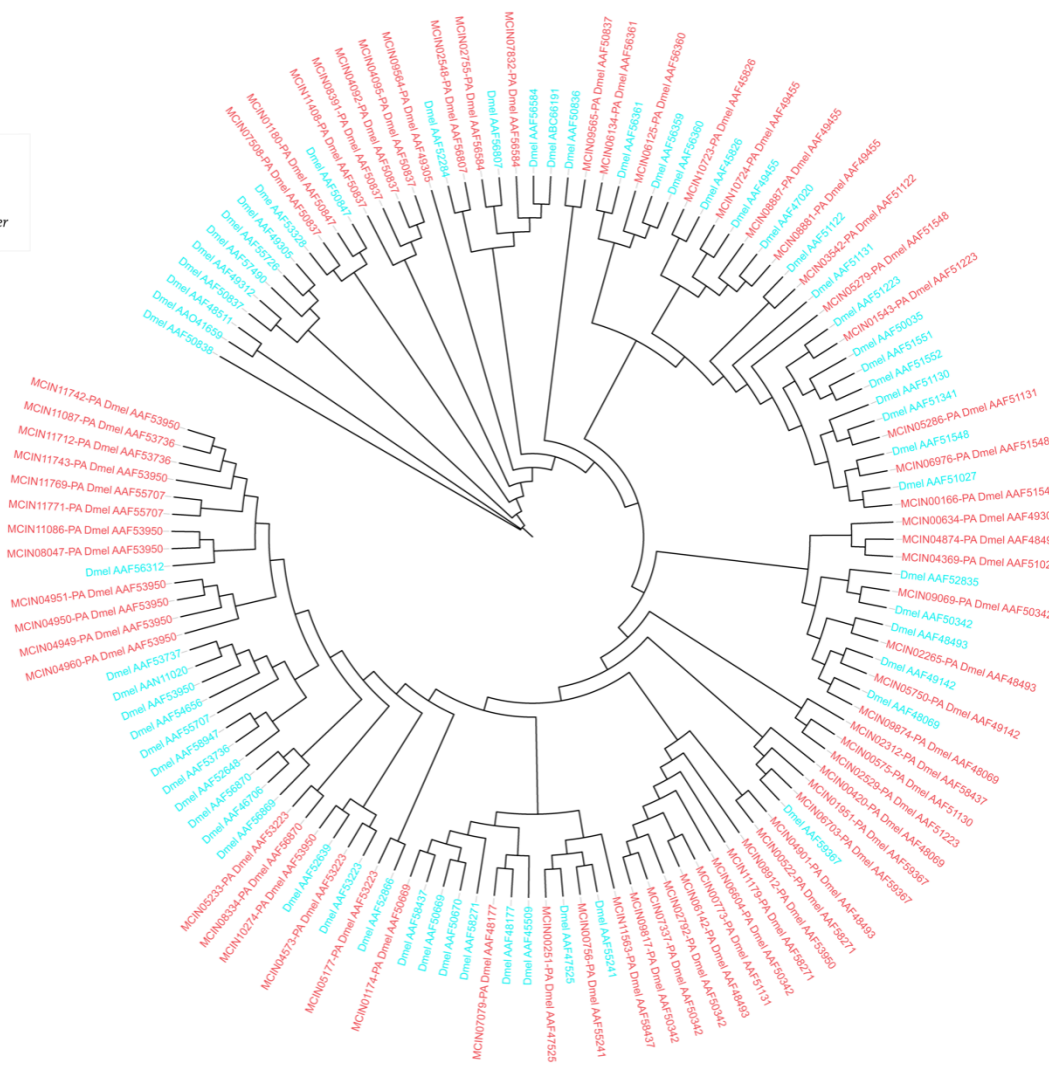

Figure S16. Phylogenetic relationship of ABC proteins from *M. cingulum* and *D. melanogaster*



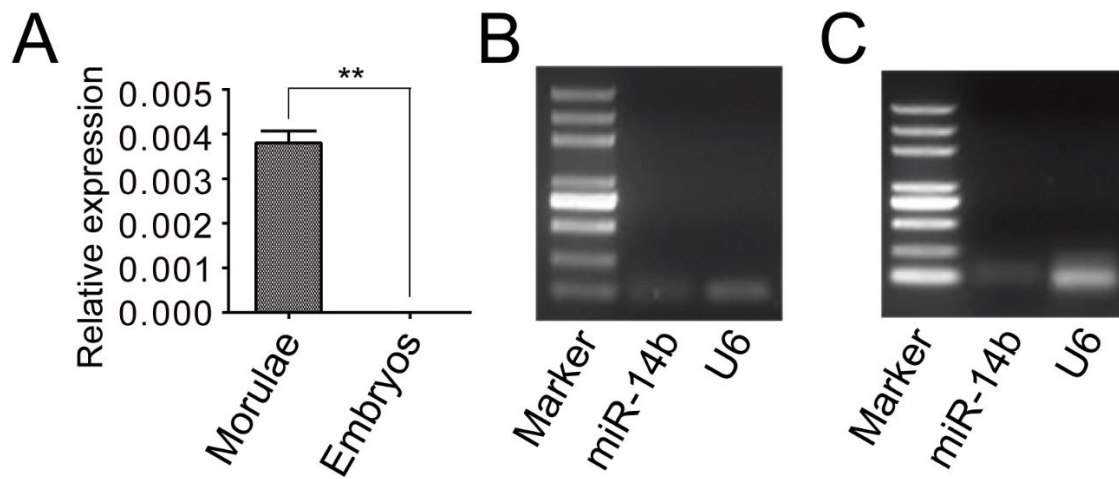

Figure S17. Different expression levels of miR-14b in different developmental stages of *M. cingulum*. A) The relative expression level of miR-14b in morulae and embryos. miR-14b is highly expressed in morulae. B) Results of quantitative real time PCR (qPCR) of miR-14b in morulae. C) Results of qPCR of miR-14b in embryos.

## Supplementary Tables

**Table S1. Genome sequencing data of *M. cingulum***

| Library    | size  | Raw-data(Coverage) | Clean-data (Gb) | Read length (bp) |
|------------|-------|--------------------|-----------------|------------------|
| Paired-end | 170bp | 22.60Gb(167X)      | 20.78           | 101              |
| Paired-end | 500bp | 30.52Gb(226X)      | 27.49           | 101              |
| Paired-end | 800bp | 26Gb(191X)         | 23.61           | 101              |
| Mate-pair  | 8Kb   | 24.55Gb(167X)      | 21.36           | 101              |

**Table S2. Estimation of *M. cingulum* genome size using K-mer analysis**

| K-mer | K-mer<br>number | K-mer<br>depth | Genome size<br>(bp) | Used bases (Gb) | Sequencing<br>(X) | depth |
|-------|-----------------|----------------|---------------------|-----------------|-------------------|-------|
| 17    | 203,535         | 64.4926        | 135,068,848         | 10,332,487,725  | 76.4979           |       |

**Table S3. Summary of the *M. cingulum* genome assembly**

| <b>Category</b>        | <b>Contigs</b> | <b>Scaffolds</b> |
|------------------------|----------------|------------------|
| Total length (bp)      | 128,805,614    | 132,362,060      |
| Max length (bp)        | 520,724        | 1,374,378        |
| Average length (bp)    | 9,662          | 23,237           |
| N20 length             | 146,572        | 458,231          |
| N50 length (bp)        | 64,884         | 192,445          |
| N90 length (bp)        | 6,290          | 21,264           |
| Total sequence numbers | 13,289         | 5,696            |

**Table S4. The published insect genomes**

| <b>Insects</b>                 | <b>GenBank</b> | <b>Source</b>      | <b>References</b>                   |
|--------------------------------|----------------|--------------------|-------------------------------------|
| <i>Drosophila melanogaster</i> | JSAE00000000   | flybase            | Science, 2000, 287(5461): 2185-95   |
| <i>Anopheles gambiae</i>       | ABKQ00000000   | vectorBase         | Science, 2002, 298(5591): 129-49    |
| <i>Bombyx mori</i>             | BABU00000000   | silkDB v2.0        | Science, 2004, 306(5703): 1937-40   |
| <i>Apis mellifera</i>          | JSUV00000000   | beebase V4.5       | Nature, 2006, 443(7114): 931        |
| <i>Aedes aegypti</i>           | AAGE00000000   | vectorBase         | Science, 2007, 316(5832): 1718-23   |
| <i>Tribolium castaneum</i>     | AAJJ00000000   | Ensembl release22  | Nature, 2008, 452(7190): 949-55     |
| <i>Culex quinquefasciatus</i>  | AAWU00000000   | vectorBase         | Science, 2010, 330(6000): 86-8      |
| <i>Camponotus floridanus</i>   | AEAB00000000   | Ant Genomes Portal | Science, 2010, 329(5995): 1068-71   |
| <i>Harpegnathos saltator</i>   | AEAC00000000   | Ant Genomes Portal |                                     |
| <i>Acyrtosiphon pisum</i>      | ABLF00000000   | aphidbase V2.1b    | PLoS Biol, 2010, 8(2): e1000313     |
| <i>Pediculus humanus</i>       | AAZO00000000   | vectorBase         | PNAS, 2010, 107(27): 12168-12173    |
| <i>Nasonia vitripennis</i>     | AAZX00000000   | NasoniaBase v1.2   | Science, 2010, 327(5963): 343-8     |
| <i>Acromyrmex echinator</i>    | AEVX00000000   | Ant Genomes Portal | Genome Res, 2011, 21(8): 1339-48    |
| <i>Linepithema humile</i>      | ADOQ00000000   | Ant Genomes Portal | PNAS, 2011, 108(14): 5673-8         |
| <i>Pogonomyrmex barbatus</i>   | ADIH00000000   | Ant Genomes Portal | PNAS, 2011, 108(14): 5667-72        |
| <i>Atta cephalotes</i>         | ADTU00000000   | Ant Genomes Portal | PLoS genetics, 2011, 7(2): e1002007 |

|                                             |              |                           |                                       |
|---------------------------------------------|--------------|---------------------------|---------------------------------------|
| <i>Solenopsis invicta</i>                   | AEAQ00000000 | Ant Genomes Portal        | PNAS, 2011, 108(14): 5679-84          |
| <i>Danaus plexippus</i>                     | AGBW00000000 | MonachBase v2.0           | Cell, 2011, 147(5): 1171-1185         |
| <i>Heliconius melpomene</i>                 | CAFA00000000 | Heliconius Genome project | Nature, 2012                          |
| <i>Dendroctonus ponderosae</i>              | APGL00000000 | Ensembl release22         | Genome Biol, 2013, 14(3): R27         |
| <i>Lasioglossum albipes</i>                 | ANOB01000000 | GCA_000346575.1           | Genome Biol, 2013, 14(12): R142       |
| <i>Plutella xylostella</i>                  | AHIO00000000 | DBM-DB v1.0               | Nature genetics, 2013, 45(2): 220-225 |
| <i>Ceratosolen solmsi</i>                   | ATAC00000000 | GCF_000503995.1           | Genome Biol, 2013, 14(12): R141       |
| <i>Antarctic midge (Belgica antarctica)</i> | JPYR00000000 | GCA_000775305.1           | Nat Commun, 2014, 54611               |
| <i>Cerapachys biroi</i>                     | JASI00000000 | GCF_000611835.1           | Curr Biol, 2014, 24(4): 451-8         |
| <i>Musca domestica</i>                      | AQPM00000000 | GCF_000371365.1           | Genome Biol, 2014, 15(10): 466        |
| <i>Stick insect (Timema cristinae)</i>      | MSSY02000000 | Nosil Lab                 | Science, 2014, 344(6185): 738-42      |
| <i>Zootermopsis nevadensis</i>              | AUST00000000 | GCA_000696155.1           | Nat Commun, 2014, 53636               |
| <i>Locusta migratoria</i>                   | AVCP00000000 | GCA_000516895.1           | Nat Commun, 2014, 52957               |
| <i>Nilaparvata lugens</i>                   | AOSB00000000 | OMIGA annotation project  | Genome Biol, 2014, 15(12): 521        |
| <i>Spodoptera frugiperda</i>                | JQCY00000000 | GCA_000753635.2           | Genomics, 2014, 104(2): 134-43        |
| <i>Diuraphis noxia</i>                      | MPKX01000000 | GCF_001186385.1           | BMC Genomics, 2015, 16(1): 429        |
| <i>Hypothenemus hampei</i>                  | LBGY00000000 | GCA_001012855.1           | Rep, 2015, 512525                     |
| <i>Lucilia cuprina</i>                      | JHUI00000000 | GCA_000699065.1           | Nat Commun, 2015, 67344               |

|                             |              |                 |                                       |
|-----------------------------|--------------|-----------------|---------------------------------------|
| <i>Operophtera brumata</i>  | JTDY01000000 | GCA_001266575.1 | Genome Biol Evol, 2015, 7(8): 2321-32 |
| <i>Cimex lectularius</i>    | JHUN00000000 | GCA_000648675.1 | Nat Commun, 2016, 7:10165             |
| <i>Ceratitidis capitata</i> | AOHK00000000 | GCF_000347755.1 | Genome Biol, 2016, 17(1): 192         |

---

**Table S5. The genome assembly assessment on different insects**

| Insects                        | BUSCO    |          |             |          |          |
|--------------------------------|----------|----------|-------------|----------|----------|
|                                | Complete | Single   | Duplication | Fragment | Missing  |
| <i>Drosophila melanogaster</i> | 0.996984 | 0.989747 | 0.00723764  | 0.001809 | 0.001206 |
| <i>Anopheles gambiae</i>       | 0.995175 | 0.977081 | 0.01809409  | 0.001206 | 0.003619 |
| <i>Bombyx mori</i>             | 0.95778  | 0.953559 | 0.00422195  | 0.018697 | 0.023522 |
| <i>Apis mellifera</i>          | 0.971049 | 0.968034 | 0.00301568  | 0.014475 | 0.014475 |
| <i>Aedes aegypti</i>           | 0.972256 | 0.897467 | 0.0747889   | 0.010253 | 0.017491 |
| <i>Tribolium castaneum</i>     | 0.993366 | 0.990953 | 0.00241255  | 0.004222 | 0.002413 |
| <i>Culex quinquefasciatus</i>  | 0.967431 | 0.917973 | 0.04945718  | 0.007841 | 0.024729 |
| <i>Camponotus floridanus</i>   | 0.923402 | 0.916164 | 0.00723764  | 0.016285 | 0.060314 |
| <i>Harpegnathos saltator</i>   | 0.586852 | 0.582027 | 0.00482509  | 0.001809 | 0.411339 |
| <i>Acyrtosiphon pisum</i>      | 0.768396 | 0.731604 | 0.03679131  | 0.04041  | 0.191194 |
| <i>Pediculus humanus</i>       | 0.872135 | 0.870326 | 0.00180941  | 0.009047 | 0.118818 |
| <i>Nasonia vitripennis</i>     | 0.95959  | 0.950543 | 0.00904704  | 0.020507 | 0.019903 |
| <i>Acromyrmex echinaior</i>    | 0.472256 | 0.471653 | 0.00060314  | 0.002413 | 0.525332 |
| <i>Linepithema humile</i>      | 0.962002 | 0.957177 | 0.00482509  | 0.007841 | 0.030157 |
| <i>Pogonomyrmex barbatus</i>   | 0.972859 | 0.970446 | 0.00241255  | 0.0193   | 0.007841 |



|                                             |          |          |            |          |          |
|---------------------------------------------|----------|----------|------------|----------|----------|
| <i>Atta cephalotes</i>                      | 0.973462 | 0.965621 | 0.00784077 | 0.013872 | 0.012666 |
| <i>Solenopsis invicta</i>                   | 0.962002 | 0.958987 | 0.00301568 | 0.021713 | 0.016285 |
| <i>Danaus plexippus</i>                     | 0.924005 | 0.905911 | 0.01809409 | 0.017491 | 0.058504 |
| <i>Heliconius melpomene</i>                 | 0.956574 | 0.951146 | 0.00542823 | 0.018094 | 0.025332 |
| <i>Dendroctonus ponderosae</i>              | 0.930639 | 0.875151 | 0.05548854 | 0.028347 | 0.041013 |
| <i>Lasioglossum albipes</i>                 | 0.989144 | 0.969843 | 0.01930036 | 0.006634 | 0.004222 |
| <i>Plutella xylostella</i>                  | 0.878166 | 0.727986 | 0.15018094 | 0.026538 | 0.095296 |
| <i>Ceratosolen solmsi</i>                   | 0.375754 | 0.375151 | 0.00060314 | 0        | 0.624246 |
| <i>Antarctic midge (Belgica antarctica)</i> | 0.979493 | 0.974065 | 0.00542823 | 0.013269 | 0.007238 |
| <i>Cerapachys biroi</i>                     | 0.983112 | 0.970446 | 0.01266586 | 0.01146  | 0.005428 |
| <i>Musca domestica</i>                      | 0.987334 | 0.969843 | 0.01749095 | 0.004222 | 0.008444 |
| <i>Stick insect (Timema cristinae)</i>      | 0.929433 | 0.924005 | 0.00542823 | 0.036791 | 0.033776 |
| <i>Zootermopsis nevadensis</i>              | 0.886007 | 0.875754 | 0.01025332 | 0.001809 | 0.112183 |
| <i>Locusta migratoria</i>                   | 0.404704 | 0.387214 | 0.01749095 | 0.283474 | 0.311821 |
| <i>Nilaparvata lugens</i>                   | 0.854041 | 0.770808 | 0.08323281 | 0.033776 | 0.112183 |
| <i>Spodoptera frugiperda</i>                | 0.781665 | 0.772618 | 0.00904704 | 0.062726 | 0.155609 |
| <i>Diuraphis noxia</i>                      | 0.642943 | 0.627865 | 0.01507841 | 0.042823 | 0.314234 |
| <i>Hypothenemus hampei</i>                  | 0.966224 | 0.963812 | 0.00241255 | 0.021713 | 0.012063 |

|                              |          |          |            |          |          |
|------------------------------|----------|----------|------------|----------|----------|
| <i>Lucilia cuprina</i>       | 0.961399 | 0.945115 | 0.01628468 | 0.00965  | 0.028951 |
| <i>Operophtera brumata</i>   | 0.946321 | 0.913148 | 0.0331725  | 0.03076  | 0.022919 |
| <i>Cimex lectularius</i>     | 0.932449 | 0.908926 | 0.02352232 | 0.016888 | 0.050663 |
| <i>Ceratitis capitata</i>    | 0.991556 | 0.987334 | 0.00422195 | 0.003619 | 0.004825 |
| <i>Macrocentrus cingulum</i> | 0.98854  | 0.941496 | 0.04704463 | 0.006031 | 0.005428 |

---

**Table S6. Classification of repeat sequences identified in the *M. cingulum* genome**

| <b>Repeat types</b>  | <b>Number of elements</b> | <b>Length occupied (bp)</b> | <b>Percentages of sequence (%)</b> |       |
|----------------------|---------------------------|-----------------------------|------------------------------------|-------|
| Interspersed repeats | SINE                      | 236                         | 67,958                             | 0.1   |
|                      | LINE                      | 1,101                       | 423,211                            | 0.32  |
|                      | LTR                       | 5,229                       | 1,465,193                          | 1.11  |
|                      | DNA elements              | 9,034                       | 3,180,053                          | 2.41  |
|                      | Unclassified              | 59,557                      | 15,510,372                         | 11.71 |
| Satellites           | 2                         | 1,283                       | 0                                  |       |
| Simple repeats       | 47,377                    | 1,843,813                   | 1.39                               |       |
| Low complexity       | 9,452                     | 1,843,813                   | 0.33                               |       |
| Total base masked    | 131,988                   | 24,335,696                  | 17.37                              |       |

**Table S7. Genome features of the *M. cingulum*, *N. vitripennis* and *A. mellifera***

| Genomic features                      | <i>M. cingulum</i> (version 1.0) | <i>N. vitripennis</i> (version 1.0) | <i>A. mellifera</i> (version 3.2) |
|---------------------------------------|----------------------------------|-------------------------------------|-----------------------------------|
| genome size (Mb)                      | 132                              | 295                                 | 227                               |
| CEGMA genes (%)                       | 99.2                             | 97.6                                | 98.8                              |
| Contig N50 (bp)                       | 64,884                           | 18,500                              | 42,850                            |
| Scaffold N50(bp)                      | 192,445                          | 709,000                             | 986,335                           |
| GC content (%)                        | 35.7                             | 40.6                                | 32.8                              |
| Repeat rate (%)                       | 24.9                             | 42.1                                | 13.6                              |
| Coding gene number                    | 11,993                           | 18,822                              | 15,314                            |
| Number of genes with Go terms         | 7,254                            | 8,778                               | 8,162                             |
| Number of genes with InterPro domains | 9,094                            | 17,079                              | 9,249                             |
| Number of miRNA                       | 111                              | 953                                 | 314                               |
| Number of tRNA                        | 144                              | 756                                 | 271                               |
| Number of snoRNA                      | 16                               | 71                                  | 53                                |
| Number of rRNA                        | 148                              | 47                                  | 38                                |

**Table S8. Gene features of *M. cingulum*, *N. vitripennis* and *A. mellifera***

| Species               | Exon Number | Exon Length | Gene Length | Intron Length | CDS Length |
|-----------------------|-------------|-------------|-------------|---------------|------------|
| <i>M. cingulum</i>    | 5.13        | 299.61      | 3127.88     | 385.13        | 1536.40    |
| <i>N. vitripennis</i> | 5.46        | 284.13      | 7281.90     | 1285.14       | 1289.52    |
| <i>A. mellifera</i>   | 5.53        | 320.29      | 7615.47     | 1291.25       | 1260.73    |

**Table S9. The insects with OGSs in InsectBase**

| <b>Species name</b>             | <b>Genome size (Mb)</b> | <b>Gene number</b> | <b>Protein number</b> |
|---------------------------------|-------------------------|--------------------|-----------------------|
| <i>Acromyrmex echinaior</i>     | 289                     | 17,277             | 17,277                |
| <i>Acyrtosiphon pisum</i>       | 525                     | 36,194             | 36,938                |
| <i>Aedes aegypti</i>            | 1,434                   | 18,800             | 17,142                |
| <i>Anopheles coluzzii</i>       | 219                     | 14,702             | 14,702                |
| <i>Anopheles darlingi</i>       | 133                     | 10,947             | 10,456                |
| <i>Anopheles gambiae</i>        | 265                     | 15,423             | 14,666                |
| <i>Anopheles sinensis</i>       | 215                     | 19,352             | 19,351                |
| <i>Anopheles stephensi</i>      | 219                     | 13,787             | 13,250                |
| <i>Apis dorsata</i>             | 223                     | 20,601             | 18,144                |
| <i>Apis florea</i>              | 224                     | 19,333             | 17,663                |
| <i>Apis mellifera</i>           | 227                     | 15,313             | 15,313                |
| <i>Athalia rosae</i>            | 159                     | 20,151             | 19,484                |
| <i>Atta cephalotes</i>          | 309                     | 18,092             | 18,092                |
| <i>Bactrocera cucurbitae</i>    | 363                     | 21,640             | 20,753                |
| <i>Bactrocera dorsalis</i>      | 402                     | 18,231             | 17,744                |
| <i>Bombus impatiens</i>         | 242                     | 21,775             | 20,895                |
| <i>Bombus terrestris</i>        | 241                     | 21,558             | 20,320                |
| <i>Bombyx mori</i>              | 467                     | 14,622             | 14,622                |
| <i>Camponotus floridanus</i>    | 228                     | 17,063             | 17,063                |
| <i>Cerapachys biroi</i>         | 206                     | 26,315             | 23,802                |
| <i>Ceratitidis capitata</i>     | 469                     | 23,710             | 23,087                |
| <i>Ceratosolen solmsi</i>       | 268                     | 13,200             | 12,833                |
| <i>Chilo suppressalis</i>       | 362                     | 10,221             | 10,221                |
| <i>Culex quinquefasciatus</i>   | 562                     | 19,389             | 19,018                |
| <i>Danaus plexippus</i>         | 238                     | 15,129             | 15,129                |
| <i>Dendroctonus ponderosae</i>  | 246                     | 13,456             | 13,459                |
| <i>Diaphorina citri</i>         | 492                     | 21,985             | 20,995                |
| <i>Drosophila ananassae</i>     | 225                     | 15,588             | 15,070                |
| <i>Drosophila erecta</i>        | 148                     | 15,615             | 15,048                |
| <i>Drosophila grimshawi</i>     | 196                     | 15,415             | 14,986                |
| <i>Drosophila melanogaster</i>  | 139                     | 17,717             | 30,439                |
| <i>Drosophila mojavensis</i>    | 188                     | 14,990             | 14,595                |
| <i>Drosophila persimilis</i>    | 184                     | 17,351             | 16,878                |
| <i>Drosophila pseudoobscura</i> | 149                     | 17,382             | 16,857                |
| <i>Drosophila sechellia</i>     | 163                     | 17,049             | 16,483                |
| <i>Drosophila simulans</i>      | 135                     | 15,912             | 15,427                |
| <i>Drosophila virilis</i>       | 201                     | 15,343             | 14,491                |
| <i>Drosophila willistoni</i>    | 230                     | 16,008             | 15,513                |
| <i>Drosophila yakuba</i>        | 161                     | 16,515             | 16,094                |

|                                |       |        |        |
|--------------------------------|-------|--------|--------|
| <i>Fopius arisanus</i>         | 149   | 20,056 | 18,906 |
| <i>Harpegnathos saltator</i>   | 288   | 18,563 | 18,563 |
| <i>Heliconius melpomene</i>    | 266   | 15,201 | 12,828 |
| <i>Linepithema humile</i>      | 213   | 16,115 | 16,115 |
| <i>Manduca sexta</i>           | 367   | 27,529 | 27,402 |
| <i>Mayetiola destructor</i>    | 180   | 22,630 | 22,024 |
| <i>Megachile rotundata</i>     | 264   | 28,682 | 26,024 |
| <i>Megaselia scalaris</i>      | 489   | 11,638 | 11,462 |
| <i>Microplitis demolitor</i>   | 243   | 18,954 | 18,169 |
| <i>Musca domestica</i>         | 728   | 20,165 | 19,549 |
| <i>Nasonia vitripennis</i>     | 287   | 18,940 | 18,821 |
| <i>Nilaparvata lugens</i>      | 1,324 | 36,723 | 36,723 |
| <i>Pediculus humanus</i>       | 108   | 11,664 | 10,775 |
| <i>Plutella xylostella</i>     | 383   | 18,072 | 18,072 |
| <i>Pogonomyrmex barbatus</i>   | 228   | 17,737 | 17,188 |
| <i>Rhodnius prolixus</i>       | 683   | 15,642 | 15,440 |
| <i>Solenopsis invicta</i>      | 343   | 16,521 | 16,521 |
| <i>Tribolium castaneum</i>     | 222   | 16,542 | 16,525 |
| <i>Vollenhovia emeryi</i>      | 280   | 27,195 | 26,071 |
| <i>Wasmannia auropunctata</i>  | 323   | 26,070 | 24,085 |
| <i>Zootermopsis nevadensis</i> | 472   | 14,610 | 14,610 |

---

**Table S10. Hemomucin genes in eight wasps**

| <b>Order</b>  | <b>Species</b>                 | <b>SRA</b> | <b>Length</b> | <b>O-glycosylation positions</b> |
|---------------|--------------------------------|------------|---------------|----------------------------------|
| Braconidae    | <i>Microplitis bicoloratus</i> | 9          | 443           | 7                                |
| Braconidae    | <i>Microplitis demolitor</i>   | 4          | 444           | 9                                |
| Braconidae    | <i>Macrocentrus cingulum</i>   |            | 579           | 56                               |
| Braconidae    | <i>Cotesia vestalis</i>        | 12         | 439           | 3                                |
| Braconidae    | <i>Cotesia rubecula</i>        | 12         | 439           | 4                                |
| Braconidae    | <i>Cotesia glomerata</i>       | 30         | 439           | 5                                |
| Ichneumonidae | <i>Venturia canescens</i>      | 1          | 616           | 65                               |
| Ichneumonidae | <i>Diadromus collaris</i>      | 2          | 436           | 5                                |



**Table S11. The different gene expression of Embryo and Pseudogerm transcriptomes in KEGG pathway**

| Pathway map 1-categories         | Pathway map 2-categories                    | Embryo upregulate | Pseudogerm upregulate |
|----------------------------------|---------------------------------------------|-------------------|-----------------------|
| Metabolism                       | Global and overview maps                    | 2                 | 1                     |
|                                  | Carbohydrate metabolism                     | 6                 | 12                    |
|                                  | Energy metabolism                           | 1                 | 2                     |
|                                  | Lipid metabolism                            | 3                 | 4                     |
|                                  | Nucleotide metabolism                       | 5                 | 1                     |
|                                  | Amino acid metabolism                       | 9                 | 4                     |
|                                  | Metabolism of other amino acids             | 4                 | 2                     |
|                                  | Glycan biosynthesis and metabolism          | 5                 | 4                     |
|                                  | Metabolism of cofactors and vitamins        | 0                 | 1                     |
|                                  | Metabolism of terpenoids and polyketides    | 0                 | 3                     |
|                                  | Biosynthesis of other secondary metabolites | 0                 | 0                     |
|                                  | Xenobiotics biodegradation and metabolism   | 0                 | 1                     |
|                                  | Genetic Information Processing              | Transcription     | 0                     |
| Translation                      |                                             | 2                 | 1                     |
| Folding, sorting and degradation |                                             | 2                 | 3                     |
| Replication and repair           |                                             | 3                 | 0                     |

|                                      |                                     |    |    |
|--------------------------------------|-------------------------------------|----|----|
| Environmental Information Processing | Membrane transport                  | 2  | 1  |
|                                      | Signal transduction                 | 39 | 28 |
|                                      | Signaling molecules and interaction | 4  | 1  |
| Cellular Processes                   | Transport and catabolism            | 7  | 7  |
|                                      | Cell motility                       | 1  | 0  |
|                                      | Cell growth and death               | 8  | 1  |
|                                      | Cellular community                  | 15 | 5  |
| Organismal Systems                   | Immune system                       | 9  | 5  |
|                                      | Endocrine system                    | 14 | 14 |
|                                      | Circulatory system                  | 4  | 1  |
|                                      | Digestive system                    | 5  | 6  |
|                                      | Excretory system                    | 1  | 2  |
|                                      | Nervous system                      | 3  | 7  |
|                                      | Sensory system                      | 0  | 4  |
|                                      | Development                         | 3  | 1  |
|                                      | Environmental adaptation            | 0  | 3  |
| Human Diseases                       | Cancers: Overview                   | 14 | 9  |
|                                      | Cancers: Specific types             | 15 | 6  |

---

|                                  |   |   |
|----------------------------------|---|---|
| Immune diseases                  | 1 | 2 |
| Neurodegenerative diseases       | 1 | 4 |
| Substance dependence             | 0 | 1 |
| Cardiovascular diseases          | 3 | 0 |
| Endocrine and metabolic diseases | 2 | 3 |
| Infectious diseases: Bacterial   | 9 | 5 |
| Infectious diseases: Viral       | 8 | 2 |
| Infectious diseases: Parasitic   | 6 | 0 |

---

**Table S12. The differently expressed miRNAs in embryo and mixed embryo transcriptomes**

| <b>miRNA</b>     | <b>Normal embryo</b> | <b>Mixed embryo</b> | <b>log2FoldChange</b> | <b>pvalue</b> |
|------------------|----------------------|---------------------|-----------------------|---------------|
| mci-miR-14b      | 20.21998745          | 1991.692631         | 4.924602884           | 0.015168939   |
| mci-miR-9a-5p    | 1.263749216          | 42.72999685         | 3.446504164           | 0.111932706   |
| mci-miR-9a-3p    | 1.263749216          | 34.02573823         | 3.189647009           | 0.144792447   |
| mci-miR-1a       | 0                    | 14.24333228         | 3.218293882           | 0.174454125   |
| mci-miR-6038     | 10.10999373          | 0                   | -2.944791637          | 0.217081046   |
| mci-bantam-5p    | 7.582495294          | 0                   | -2.553140638          | 0.285047192   |
| mci-miR-210a-3p  | 7.582495294          | 0                   | -2.553140638          | 0.285047192   |
| mci-miR-iab-4-3p | 0                    | 7.912962379         | 2.472083197           | 0.300695842   |
| mci-miR-1175     | 1.263749216          | 15.03462852         | 2.23409632            | 0.327254046   |
| mci-miR-932      | 6.318746078          | 0                   | -2.308083435          | 0.332374298   |
| mci-miR-2491c    | 41.70372412          | 7.912962379         | -1.828253143          | 0.366669062   |
| mci-miR-3770     | 17.69248902          | 69.63406894         | 1.563998291           | 0.419362271   |
| mci-miR-6065     | 115.0011786          | 317.3097914         | 1.207760725           | 0.505654641   |
| mci-miR-2779a    | 0                    | 3.165184952         | 1.398284856           | 0.537206421   |
| mci-miR-993-3p   | 0                    | 3.165184952         | 1.398284856           | 0.537206421   |
| mci-miR-iab-8-3p | 0                    | 3.165184952         | 1.398284856           | 0.537206421   |
| mci-bantam-3p    | 2.527498431          | 0                   | -1.36733031           | 0.541944226   |
| mci-miR-210b     | 2.527498431          | 0                   | -1.36733031           | 0.541944226   |
| mci-miR-281-5p   | 5.054996863          | 0.791296238         | -1.312692382          | 0.582609892   |
| mci-miR-4945     | 11.37374294          | 3.165184952         | -1.219072159          | 0.588920427   |
| mci-miR-996      | 0                    | 2.373888714         | 1.195588272           | 0.593695913   |
| mci-miR-2779f    | 1.263749216          | 0                   | -1.081479192          | 0.62619967    |
| mci-miR-3477-3p  | 1.263749216          | 0                   | -1.081479192          | 0.62619967    |

|                  |             |             |              |             |
|------------------|-------------|-------------|--------------|-------------|
| mci-miR-971      | 1.263749216 | 0           | -1.081479192 | 0.62619967  |
| mci-miR-2491a    | 34.12122882 | 15.03462852 | -0.918543525 | 0.644005878 |
| mci-miR-252-3p   | 0           | 1.582592476 | 0.970549781  | 0.664401652 |
| mci-miR-263a     | 0           | 1.582592476 | 0.970549781  | 0.664401652 |
| mci-miR-71a      | 2.527498431 | 7.912962379 | 1.005734728  | 0.665065447 |
| mci-miR-2491b    | 69.50620686 | 34.81703447 | -0.805577886 | 0.668644215 |
| mci-miR-6067     | 61.92371157 | 30.86055328 | -0.808089568 | 0.669759722 |
| mci-miR-33       | 5.054996863 | 1.582592476 | -0.899790707 | 0.705393978 |
| mci-miR-276      | 0           | 0.791296238 | 0.596960254  | 0.788636567 |
| mci-miR-277-5p   | 0           | 0.791296238 | 0.596960254  | 0.788636567 |
| mci-miR-305      | 0           | 0.791296238 | 0.596960254  | 0.788636567 |
| mci-miR-307-5p   | 0           | 0.791296238 | 0.596960254  | 0.788636567 |
| mci-miR-87       | 0           | 0.791296238 | 0.596960254  | 0.788636567 |
| mci-miR-iab-4-5p | 0           | 0.791296238 | 0.596960254  | 0.788636567 |
| mci-miR-6001     | 8.846244509 | 4.747777427 | -0.594455326 | 0.792409835 |
| mci-miR-6006     | 5.054996863 | 8.704258617 | 0.519521645  | 0.817976599 |
| mci-miR-2491d    | 5.054996863 | 7.912962379 | 0.423834485  | 0.851835053 |
| mci-miR-308      | 18.95623823 | 15.03462852 | -0.253592447 | 0.901323242 |
| mci-miR-278      | 1.263749216 | 0.791296238 | -0.22379999  | 0.92081334  |
| mci-miR-277-3p   | 2.527498431 | 3.165184952 | 0.16854129   | 0.943714403 |
| mci-miR-34       | 1.263749216 | 1.582592476 | 0.123433982  | 0.957577503 |
| mci-miR-281-3p   | 5.054996863 | 5.539073665 | 0.082910259  | 0.971353955 |
| mci-miR-184      | 5.054996863 | 4.747777427 | -0.0557747   | 0.980846862 |
| mci-miR-12       | 2.527498431 | 2.373888714 | -0.044437896 | 0.985157543 |
| mci-miR-282      | 32.85747961 | 33.23444199 | 0.01309561   | 0.994576002 |
| mci-miR-375      | 24.0112351  | 23.73888714 | -0.012839458 | 0.994822876 |

---

**Table S13. Comparison of gene numbers for Chemoreception in *A. mellifera*, *C. floridanum*, *C. solmsi*, *M. cingulum*, *N. vitripennis* and *S. invicta***

| Organisms             | IR | SNMP | CSP | OR  | OBP | GR |
|-----------------------|----|------|-----|-----|-----|----|
| <i>A. mellifera</i>   | 24 | 10   | 9   | 142 | 21  | 18 |
| <i>C. floridanum</i>  | 33 | 20   | 9   | 80  | 40  | 24 |
| <i>C. solmsi</i>      | 29 | 11   | 8   | 49  | 10  | 6  |
| <i>M. cingulum</i>    | 25 | 9    | 3   | 89  | 7   | 14 |
| <i>N. vitripennis</i> | 32 | 12   | 10  | 131 | 90  | 31 |
| <i>S. invicta</i>     | 24 | 10   | 15  | 125 | 16  | 28 |

**Table S14. Comparison of gene numbers for Gene families associated with insecticide resistance and detoxification in *D. melanogaster*, *A. mellifera*, *C. floridanum*, *C. solmsi*, *M. cingulum*, *N. vitripennis* and *S. invicta***

| Organisms              | P450 | GST | ABC |
|------------------------|------|-----|-----|
| <i>D. melanogaster</i> | 85   | 35  | 59  |
| <i>A. mellifera</i>    | 56   | 14  | 64  |
| <i>C. floridanum</i>   | 108  | 22  | 99  |
| <i>C. solmsi</i>       | 46   | 17  | 78  |
| <i>M. cingulum</i>     | 43   | 15  | 68  |
| <i>N. vitripennis</i>  | 96   | 26  | 62  |
| <i>S. invicta</i>      | 133  | 12  | 69  |

**Table S15. Comparison of gene numbers of insect immune in *A. mellifera*, *C. floridanum*, *C. solmsi*, *M. cingulum*, *N. vitripennis* and *S. invicta***

| <b>Genes</b>  | <b><i>A. mellifera</i></b> | <b><i>C. floridanum</i></b> | <b><i>C. solmsi</i></b> | <b><i>D. melanogaster</i></b> | <b><i>M. cingulum</i></b> | <b><i>N. vitripennis</i></b> | <b><i>S. invicta</i></b> |
|---------------|----------------------------|-----------------------------|-------------------------|-------------------------------|---------------------------|------------------------------|--------------------------|
| <b>CASPs</b>  | 5                          | 6                           | 9                       | 7                             | 2                         | 8                            | 7                        |
| <b>CASPAs</b> | 1                          | 1                           | 1                       | 1                             | 2                         | 1                            | 1                        |
| <b>CATs</b>   | 3                          | 1                           | 1                       | 2                             | 0                         | 1                            | 1                        |
| <b>CTLs</b>   | 13                         | 22                          | 25                      | 41                            | 19                        | 32                           | 11                       |
| <b>FREPs</b>  | 2                          | 1                           | 1                       | 14                            | 2                         | 1                            | 2                        |
| <b>GALEs</b>  | 3                          | 5                           | 3                       | 6                             | 3                         | 3                            | 2                        |
| <b>IAPs</b>   | 5                          | 12                          | 5                       | 4                             | 4                         | 17                           | 6                        |
| <b>LYSs</b>   | 2                          | 3                           | 1                       | 12                            | 1                         | 1                            | 1                        |
| <b>MLs</b>    | 4                          | 2                           | 3                       | 8                             | 4                         | 7                            | 5                        |
| <b>PRRs</b>   | 6                          | 11                          | 6                       | 17                            | 6                         | 12                           | 5                        |
| <b>GNBPs</b>  | 2                          | 1                           | 0                       | 6                             | 2                         | 2                            | 2                        |
| <b>PGRPs</b>  | 4                          | 10                          | 6                       | 11                            | 4                         | 10                           | 3                        |
| <b>PPOs</b>   | 5                          | 5                           | 8                       | 10                            | 3                         | 10                           | 4                        |
| <b>RELS</b>   | 4                          | 7                           | 7                       | 4                             | 3                         | 6                            | 2                        |
| <b>SPZs</b>   | 7                          | 13                          | 9                       | 6                             | 5                         | 9                            | 4                        |
| <b>TEPs</b>   | 4                          | 5                           | 3                       | 6                             | 3                         | 3                            | 3                        |
| <b>TOLLs</b>  | 8                          | 9                           | 6                       | 9                             | 13                        | 10                           | 4                        |

CASPs: caspases, CASPAs: caspase Activators, CATs: Catalases, CTLs: C-type lectins, FREPs: Fibrinogen-Related Proteins, GALEs: Galactoside-Binding Lectins, IAPs: Inhibitors of Apoptosis, LYSs: Lysozymes, MLs: MD2-Like Receptors, PPOs: prophenoloxidasases, PRRs: Pattern Recognition Receptors, GNBPs: Gram-negative binding proteins, PGRPs: peptidoglycan recognition proteins, RELs: Relish-like Proteins, SODs: Superoxide Dismutases, Spzs: Spaetzle-like Proteins, TEPs: thioester-containing protein, TOLLs: Toll-Receptors



**Table S16. The PCR primer for target genes of mci-miR-14b**

| <b>Genes</b> | <b>Primer</b>           |
|--------------|-------------------------|
| <i>MBP-1</i> | TTTACGGTTCGGCTATCACTTT  |
|              | CGGCATCGCTAGATCCTCA     |
| <i>KMT2E</i> | TTGAAATCGTGCGTGGTCTT    |
|              | GAGGGCTCATCGTAGGTGGTA   |
| <i>RUNT</i>  | CCAGTCCAACACCCACGAA     |
|              | TGGCTTACACTTATGCCTCCTAT |
